# Supplementary material for: The Plant Defensin Ppdef1 Is a Novel Topical Treatment for Onychomycosis
Source: MDPI journal article supplement (doi:10.3390/jof9111111), 2023-11-17
Supplement: s1 [file s1]

**Table S1. Statistical analysis of pezadeftide structures. All statistics are given as mean  $\pm$  SD.**

|                                                         |                   |
|---------------------------------------------------------|-------------------|
| <b>Experimental restraints</b>                          |                   |
| Total no. distance restraints                           | 419               |
| Intraresidue                                            | 128               |
| Sequential                                              | 132               |
| Medium range, $i-j < 5$                                 | 53                |
| Long range, $i-j \geq 5$                                | 106               |
| Hydrogen bond restraints                                | 24                |
| Dihedral angle restraints                               |                   |
| Phi                                                     | 38                |
| psi                                                     | 25                |
| chi1                                                    | 19                |
| <b>Deviations from idealized geometry</b>               |                   |
| Bond lengths (Å)                                        | 0.011 $\pm$ 0.000 |
| Bond angles (deg)                                       | 1.076 $\pm$ 0.041 |
| Impropers (deg)                                         | 1.36 $\pm$ 0.11   |
| NOE (Å)                                                 | 0.010 $\pm$ 0.002 |
| cDih (deg)                                              | 0.056 $\pm$ 0.053 |
| <b>Mean energies (kcal/mol)</b>                         |                   |
| Overall                                                 | -1626 $\pm$ 35    |
| Bonds                                                   | 20.2 $\pm$ 1.4    |
| Angles                                                  | 58.4 $\pm$ 5.3    |
| Improper                                                | 23.3 $\pm$ 3.4    |
| van Der Waals                                           | -216.2 $\pm$ 7.2  |
| NOE                                                     | 0.04 $\pm$ 0.01   |
| cDih                                                    | 0.06 $\pm$ 0.09   |
| Electrostatic                                           | -1738 $\pm$ 35    |
| <b>Violations</b>                                       |                   |
| NOE violations exceeding 0.2 Å                          | 0                 |
| Dihedral violations exceeding 2.0 Å                     | 0                 |
| <b>Rms deviation from mean structure, Å</b>             |                   |
| Backbone atoms                                          | 1.59 $\pm$ 0.44   |
| All heavy atoms                                         | 2.35 $\pm$ 0.45   |
| Backbone atoms, residues 18-26,5-7,32-37,43-48          | 0.61 $\pm$ 0.14   |
| All heavy atoms, residues 18-26,5-7,32-37,43-48         | 1.30 $\pm$ 0.23   |
| <b>Stereochemical quality (according to MolProbity)</b> |                   |
| Residues in most favoured Ramachandran region, %        | 94.7 $\pm$ 2.2    |
| Ramachandran outliers, %                                | 0.6 $\pm$ 1.3     |
| Unfavourable sidechain rotamers, %                      | 0.3 $\pm$ 0.7     |
| Clashscore, all atoms                                   | 14.6 $\pm$ 4.1    |
| Overall MolProbity score                                | 2.1 $\pm$ 0.1     |
